# Supplementary material for: Water Shortage Affects Vegetative and Reproductive Stages of Common Bean (Phaseolus vulgaris) Chilean Landraces, Differentially Impacting Grain Yield Components
Source: MDPI journal article supplement (doi:10.3390/plants11060749), 2022-03-11
Supplement: s1 [file s1]

Table S2. Water stress indices in Chilean landraces.

| Landrace    | DTI | GMP   | MP    |
|-------------|-----|-------|-------|
| Enriqueta   | 1.9 | 470.3 | 517.4 |
| Coyunda     | 2.1 | 491.4 | 545.5 |
| Blanco      | 2.5 | 534.9 | 578.0 |
| Pinto       | 1.4 | 400.3 | 420.3 |
| Negro argel | 1.1 | 358.7 | 396.5 |
| Coscorron   | 2.5 | 535.7 | 554.4 |
| Bayote      | 3.1 | 603.3 | 647.7 |
| Tortola     | 1.6 | 433.8 | 487.9 |
| Manteca     | 3.4 | 626.1 | 677.4 |
| p < 0.05    | *** | ***   | **    |
| LSD         | 0.9 | 106.8 | 128.0 |
| Mean        | 2.2 | 494.9 | 536.1 |

\*\* = p<0.01; \*\*\* = p<0.001
