# Supplementary material for: Water Shortage Affects Vegetative and Reproductive Stages of Common Bean (Phaseolus vulgaris) Chilean Landraces, Differentially Impacting Grain Yield Components
Source: MDPI journal article supplement (doi:10.3390/plants11060749), 2022-03-11

a

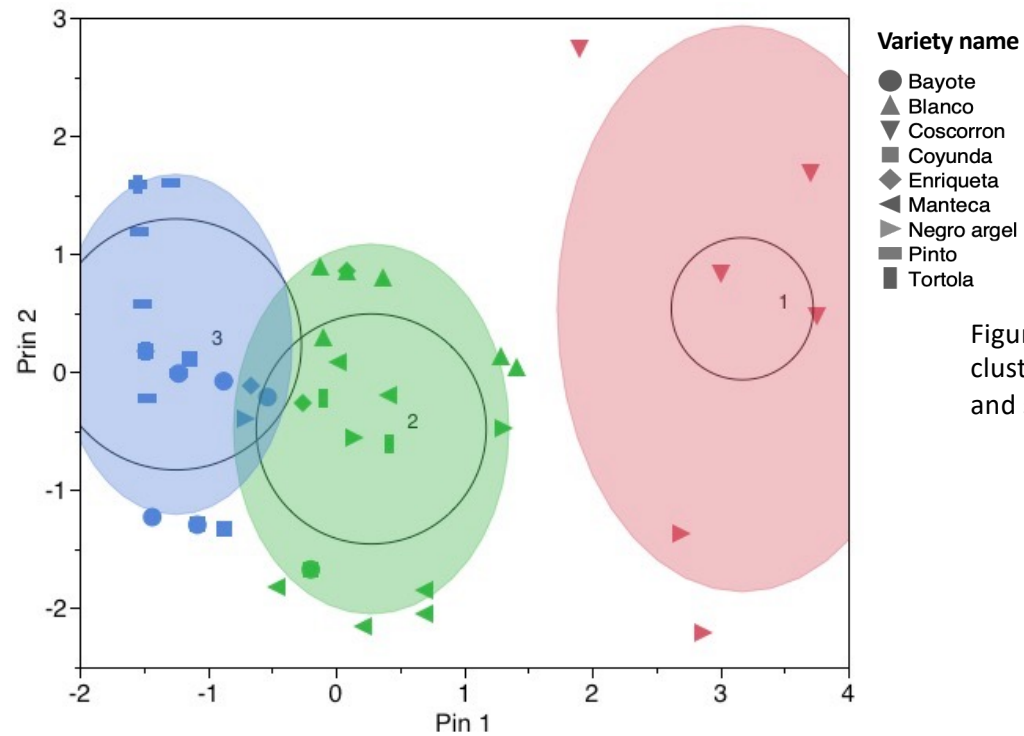

Figure S1. Phenological traits grouping for nine Chilean landraces. (a) Kmeans clustering analysis for traits flowering days, pod days, physiological maturity and seed filling (b) Scatterplot matrix for clustering from (a).

b

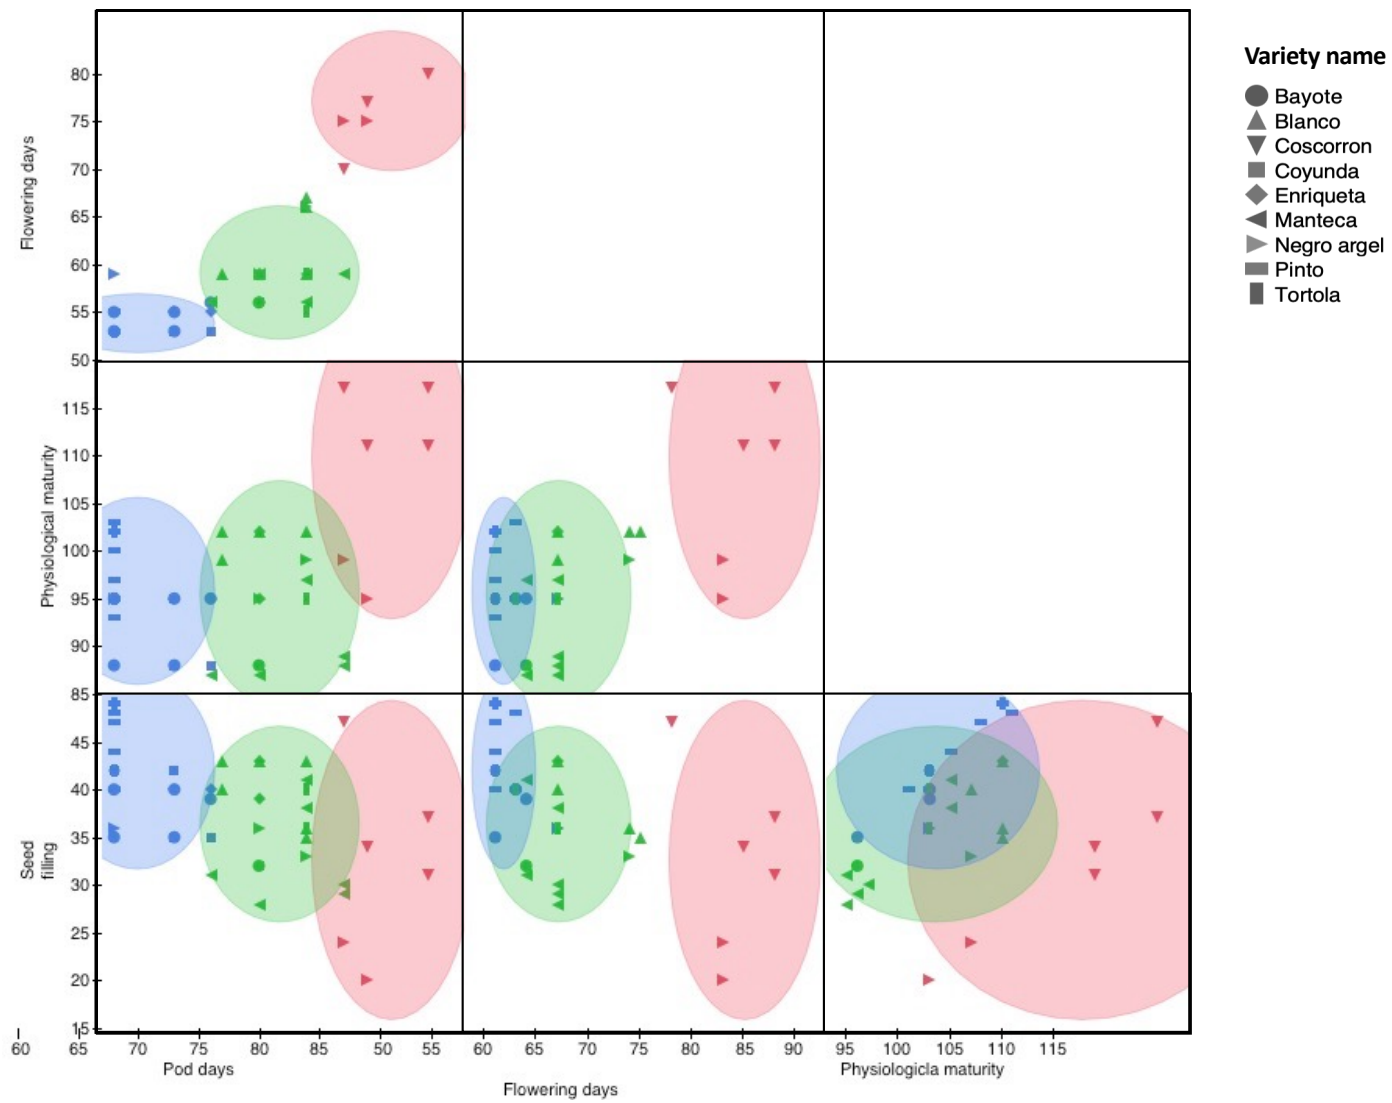

Supplement: s1 [file s1]
